# Supplementary material
Source: publisher figshare collection journal article supplement (https://acs.figshare.com/ndownloader/files/12035522)
Supplement: Supplementary file 1 [file 12035522]

# **Physical Behavior of the Phases from the Liquid–Liquid Equilibrium of Citrus Essential Oils Systems at 298.2 K**

Daniel Gonçalves,\* Mayara F. Paludetti, Priscila M. Florido, Camila Tonetti, Cintia B. Gonçalves,\* and Christianne E. C. Rodrigues\*

Separation Engineering Laboratory (LES), Department of Food Engineering (ZEA/FZEA), University of Sao Paulo (USP), Avenida Duque de Caxias Norte 225, 13635-900 Pirassununga, Brazil

Corresponding Authors

\*E-mail: [danielg@usp.br](mailto:danielg@usp.br)

\*E-mail: [cintiabg@usp.br](mailto:cintiabg@usp.br)

\*E-mail: [chrisrodrigues@usp.br](mailto:chrisrodrigues@usp.br)

## **Supporting Information**

Equations for the implementation of the UNIFAC-VISCO thermodynamic model.

The UNIFAC-VISCO model is based on the Eyring model<sup>1</sup> for kinematic viscosity, as eq S1.

$$\ln(\nu M) = \sum_i x_i \ln(\nu_i M_i) + \frac{\Delta^* G^E}{RT} \quad (S1)$$

Where  $\Delta^* G^E$  is the excess molar free energy of the mixture,  $\nu$  and  $M$  are the kinematic viscosity and molar mass of the mixture, respectively.  $\nu_i$ ,  $M_i$ , and  $x_i$  are the kinematic viscosity, molar mass, and the molar fraction of the pure component  $i$  present in the mixture,  $R$  is the universal gas constant, and  $T$  is the mixture temperature.

In this model,  $\Delta^* G^E$  is assumed as the sum of two contributions: (i) combinatorial,  $\Delta^* G^{EC}$  (eq S2), which refers to the difference among the molecules sizes, and (ii) residual,  $\Delta^* G^{ER}$  (eq S3), that considers the interaction energy among the different groups present in the mixture.

$$\Delta^* G^E = \Delta^* G^{EC} + \Delta^* G^{ER} \quad (S2)$$

$$\Delta^* G^E = RT \sum_i x_i \ln \gamma_i^* \quad (S3)$$

Where  $\gamma_i^*$  is a function of the combinatorial  $\gamma_i^{*C}$  and the residual  $\gamma_i^{*R}$ . The combinatorial term ( $\Delta^* G^{EC}$ ) is presented in eq S4.

$$\frac{\Delta^* G^{EC}}{RT} = \sum_i x_i \ln \frac{\Phi_i}{x_i} + \frac{z}{2} \sum_i q_i x_i \ln \frac{\theta_i}{\Phi_i} \quad (S4)$$

Where  $z$  is the coordinate number ( $z = 10$ ).  $\Phi_i$  and  $\theta_i$  are the volume and the superficial area fractions, respectively, which can be calculated by eqs S5 and S6.

$$\theta_i = \frac{q_i x_i}{\sum_j q_j x_j} \quad (S5)$$

$$\Phi_i = \frac{r_i x_i}{\sum_j r_j x_j} \quad (S6)$$

Where  $q_i$  and  $r_i$  are the volume and superficial area parameters of the component  $i$ , respectively, which are calculated by eqs S7 and S8.

$$q_i = \sum_k^k n_k^{(i)} Q_k \quad (S7)$$

$$r_i = \sum_k^k n_k^{(i)} R_k \quad (S8)$$

Where  $n_k^{(i)}$  is the number of  $k$  groups existing in the component  $i$ .  $R_k$  and  $Q_k$  are the volume and superficial area parameters of the group  $k$ , respectively, which were obtained from Fredenslund et al.<sup>2</sup> Table S1 shows the  $n_k^{(i)}$  of each component  $i$  studied.

**Table S1** – Number of  $k$  groups existing in each component  $i$  ( $n_k^{(i)}$ ).

| Component ( $i$ )   | Group $k$       |                 |    |    |                  |   |
|---------------------|-----------------|-----------------|----|----|------------------|---|
|                     | CH <sub>3</sub> | CH <sub>2</sub> | OH | CH | H <sub>2</sub> O | C |
| Limonene            | 2               | 4               | 0  | 2  | 0                | 2 |
| $\beta$ -Pinene     | 2               | 4               | 0  | 2  | 0                | 0 |
| $\gamma$ -Terpinene | 3               | 2               | 0  | 3  | 0                | 0 |
| Linalool            | 3               | 3               | 1  | 2  | 0                | 2 |
| Citral              | 3               | 2               | 0  | 2  | 1                | 0 |
| Ethanol             | 1               | 1               | 1  | 0  | 0                | 0 |
| Water               | 0               | 0               | 0  | 0  | 1                | 0 |

The residual term ( $\Delta^* G^{ER}$ ) is calculated by eqs S9 and S10.

$$\frac{\Delta^* G^{ER}}{RT} = - \sum_i^i x_i \ln \gamma_i^{*R} \quad (S9)$$

$$\gamma_i^{*R} = \sum_k^k n_k^{(i)} (\ln \gamma_k^* - \ln \gamma_k^{*(i)}) \quad (S10)$$

Where  $\ln \gamma_k^*$  is the individual contribution of each  $k$  group of the component  $i$  present in the mixture and  $\ln \gamma_k^{*(i)}$  is the individual contribution of the group  $k$  in a reference solution composed of only the component  $i$  (pure solution). The term  $\ln \gamma_k^*$  is calculated by eqs S11 to S14.

$$\ln \gamma_k^* = Q_k \left[ 1 - \ln \left( \sum_m^m \theta_m \varphi_{mk}^* \right) - \sum_m^m \frac{\theta_m \varphi_{km}^*}{\sum_n^n \theta_n \varphi_{nm}^*} \right] \quad (\text{S11})$$

$$\theta_m = \frac{Q_m X_m}{\sum_n^n Q_n X_n} \quad (\text{S12})$$

$$X_m = \frac{\sum_j^j n_m^{(j)} x_j}{\sum_j^j \sum_n^n n_n^{(j)} x_j} \quad (\text{S13})$$

$$\varphi_{nm}^* = \exp \left( -\frac{\alpha_{nm}}{T} \right) \quad (\text{S14})$$

Where  $\alpha_{nm}$  is the interaction parameter between the groups  $n$  and  $m$ , being  $\alpha_{nm} \neq \alpha_{mn}$ . The interaction parameters among the groups present in the mixtures studied were previously adjusted by Florido et al.<sup>3</sup> for the following systems: bergamot essential oil (limonene + linalyl acetate + linalool + ethanol + water), lemon/lime essential oil (limonene +  $\gamma$ -terpinene +  $\beta$ -pinene + citral + ethanol + water), and mint essential oil (limonene + carvone + ethanol + water), at  $T = (298.2 \pm 0.1)$  K. The  $\alpha_{nm}$  used for the prediction procedure is exposed in Table S2. Eq S11 can be also used to calculate the term  $\gamma_k^{*(i)}$ .

**Table S2** – Interaction parameters between the  $k$  groups present in the components of the systems ( $\alpha_{nm}$ ).

| Group $n$        | Group $m$       |                 |         |        |                  |         |
|------------------|-----------------|-----------------|---------|--------|------------------|---------|
|                  | CH <sub>3</sub> | CH <sub>2</sub> | OH      | CH     | H <sub>2</sub> O | C       |
| CH <sub>3</sub>  | -               | -1015.8         | 1143.3  | 331.6  | -1537.1          | 1570.4  |
| CH <sub>2</sub>  | 1850.0          | -               | -1041.5 | 1343.9 | 1130.3           | 399.5   |
| OH               | -445.0          | -1032.0         | -       | -138.8 | 629.8            | 337.5   |
| CH               | -1301.1         | -692.1          | 1905.1  | -      | -857.7           | -79.1   |
| H <sub>2</sub> O | -1416.5         | 562.4           | 212.2   | 1267.5 | -                | -1254.0 |
| C                | 1024.0          | 959.4           | 2006.0  | -33.2  | 1130.3           | -       |

## References

- (1) Chevalier, J. L.; Petrino, P.; Gaston-Bonhomme, Y. Estimation Method for the Kinematic Viscosity of a Liquid-Phase Mixture. *Chem. Eng. Sci.* **1988**, 43 (6), 1303–1309.
- (2) Fredenslund, A.; Jones, R. L.; Prausnitz, J. M. Group-Contribution Estimation of Activity Coefficients in Nonideal Liquid Mixtures. *AIChE J.* **1975**, 21 (6), 1086 – 1099.
- (3) Florido, P. M.; Andrade, I. M. G.; Capellini, M. C.; Carvalho, F. H.; Aracava, K. K.; Koshima, C. C.; Rodrigues, C. E. C.; Gonçalves, C. B. Viscosities and Densities of Systems Involved in the Deterpenation of Essential Oils by Liquid-Liquid Extraction: New UNIFAC-VISCO Parameters. *J. Chem. Thermodyn.* **2014**, 72, 152–160.
